# Supplementary material for: Synthesis and Anticancer Activity of Indole-Functionalized Derivatives of Betulin
Source: MDPI journal article supplement (doi:10.3390/pharmaceutics14112372), 2022-11-04
Supplement: s1 [file s1]

## Supplementary Materials

# Synthesis and anticancer activity of indole-functionalized derivatives of betulin

Zuzanna Rzepka <sup>1,\*</sup>, Ewa Bębenek <sup>2</sup>, Elwira Chrobak <sup>2</sup> and Dorota Wrześniok <sup>1,\*</sup>

<sup>1</sup> Department of Pharmaceutical Chemistry, Faculty of Pharmaceutical Sciences in Sosnowiec, Medical University of Silesia in Katowice, 4 Jagiellońska Str., 41-200 Sosnowiec, Poland

<sup>2</sup> Department of Organic Chemistry, Faculty of Pharmaceutical Sciences in Sosnowiec, Medical University of Silesia in Katowice, 4 Jagiellońska Str., 41-200 Sosnowiec, Poland

\* Correspondence: zrzepka@sum.edu.pl (ZR), dwrzesniok@sum.edu.pl (DW)

### LIST OF CONTENTS

**Fig. S1.** <sup>1</sup>H-NMR spectrum for EB355A (600 MHz, CDCl<sub>3</sub>)

**Fig. S2.** <sup>13</sup>C-NMR spectrum for EB355A (150 MHz, CDCl<sub>3</sub>)

**Fig. S3.** HRMS spectrum for EB355A

**Fig. S4.** <sup>1</sup>H-NMR spectrum for EB365 (600 MHz, CDCl<sub>3</sub>)

**Fig. S5.** <sup>13</sup>C-NMR spectrum for EB365 (150 MHz, CDCl<sub>3</sub>)

**Fig. S6.** HRMS spectrum for EB365

**Table S1.** Prediction of the ADMET profile of betulin based on computer calculations. **Table**

**S2.** The theoretical values of lipophilicity for betulin, betulinic acid, EB355A and EB365

**Fig. S1.**  $^1\text{H}$ -NMR spectrum for EB355A (600 MHz,  $\text{CDCl}_3$ )

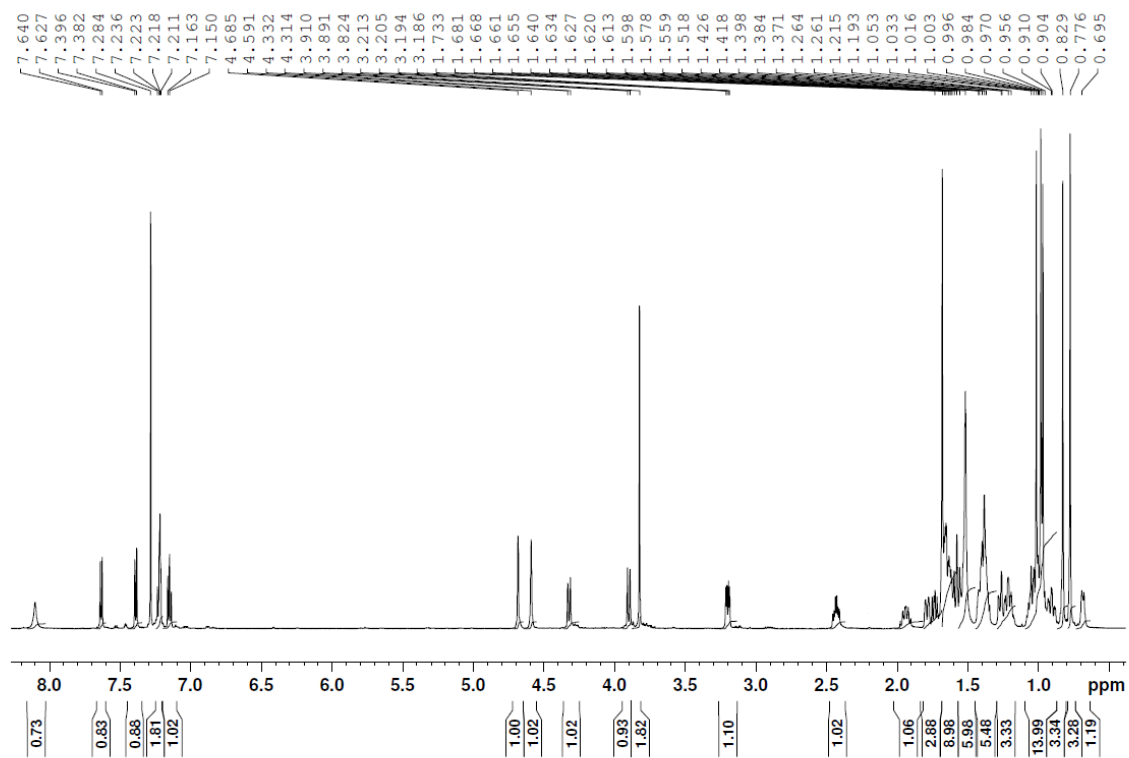

**Fig. S2.**  $^{13}\text{C}$ -NMR spectrum for EB355A (150 MHz,  $\text{CDCl}_3$ )

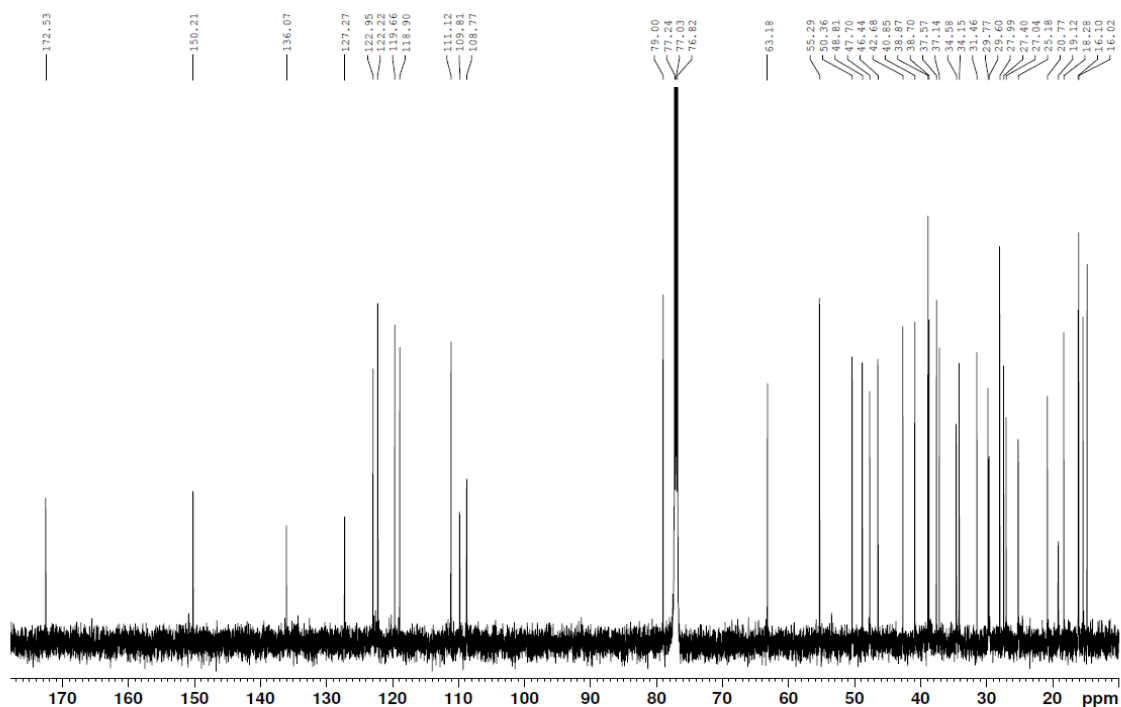

Fig. S3. HRMS spectrum for EB355A

|               |                          |            |               |
|---------------|--------------------------|------------|---------------|
| Analysis Name | D:\Data\EB 355A          | Operator   | KM            |
| Method        | APCI_low_mass_negative.m | Instrument | impact II     |
| Sample Name   | 1-tolil                  |            | 1825265.10082 |
| Comment       |                          |            |               |

#### Acquisition Parameter

|             |          |                      |          |                  |           |
|-------------|----------|----------------------|----------|------------------|-----------|
| Source Type | APCI     | Ion Polarity         | Negative | Set Nebulizer    | 2.0 Bar   |
| Focus       | Active   | Set Capillary        | 4000 V   | Set Dry Heater   | 200 °C    |
| Scan Begin  | 100 m/z  | Set End Plate Offset | -500 V   | Set Dry Gas      | 4.0 l/min |
| Scan End    | 1600 m/z | Set Charging Voltage | 2000 V   | Set Divert Valve | Source    |
|             |          | Set Corona           | 15000 nA | Set APCI Heater  | 450 °C    |

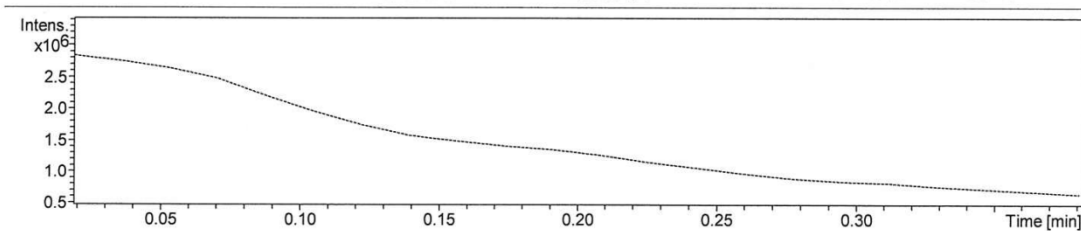

#### -MS, 0.0-0.2min #2-10

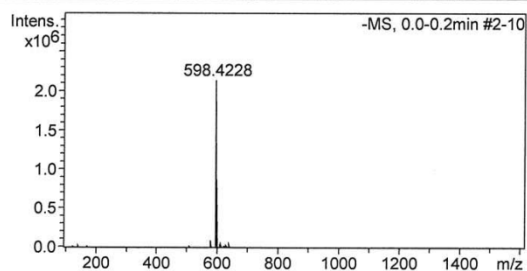

| # | m/z      | Res.  | S/N     | I       | I %   | FWHM   |
|---|----------|-------|---------|---------|-------|--------|
| 1 | 598.4228 | 19628 | 52253.3 | 2138804 | 100.0 | 0.0305 |

Fig. S4.  $^1\text{H}$ -NMR spectrum for EB365 (600 MHz,  $\text{CDCl}_3$ )

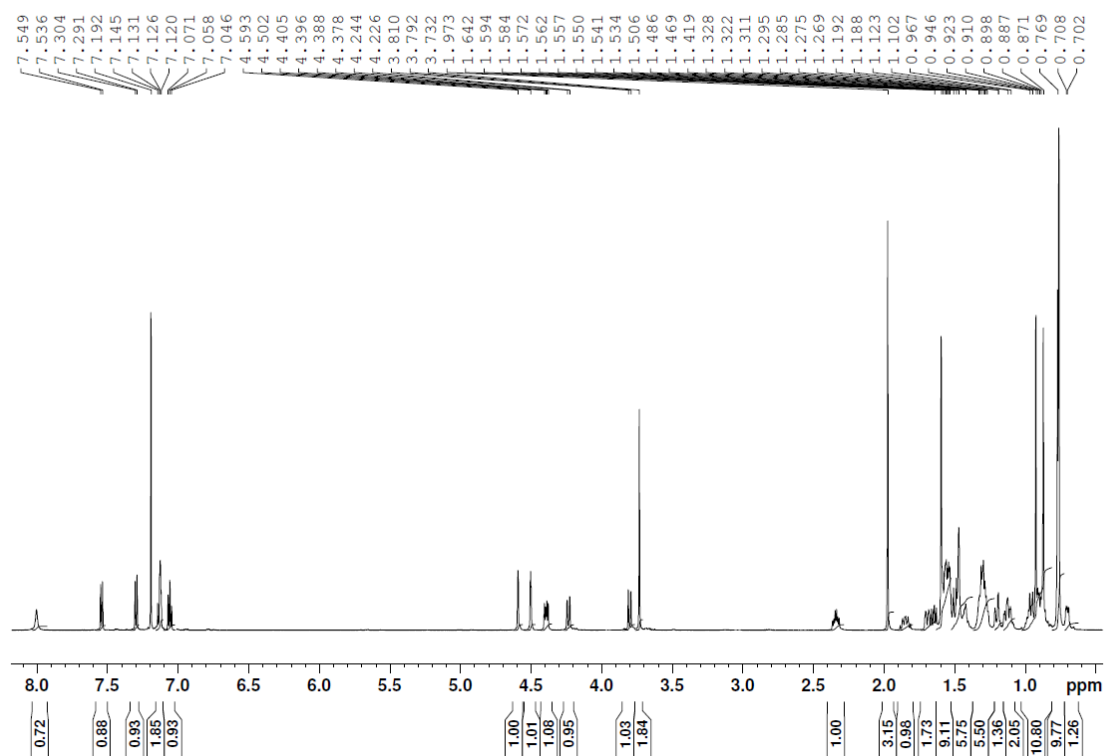

Fig. S5.  $^{13}\text{C}$ -NMR spectrum for EB365 (150 MHz,  $\text{CDCl}_3$ )

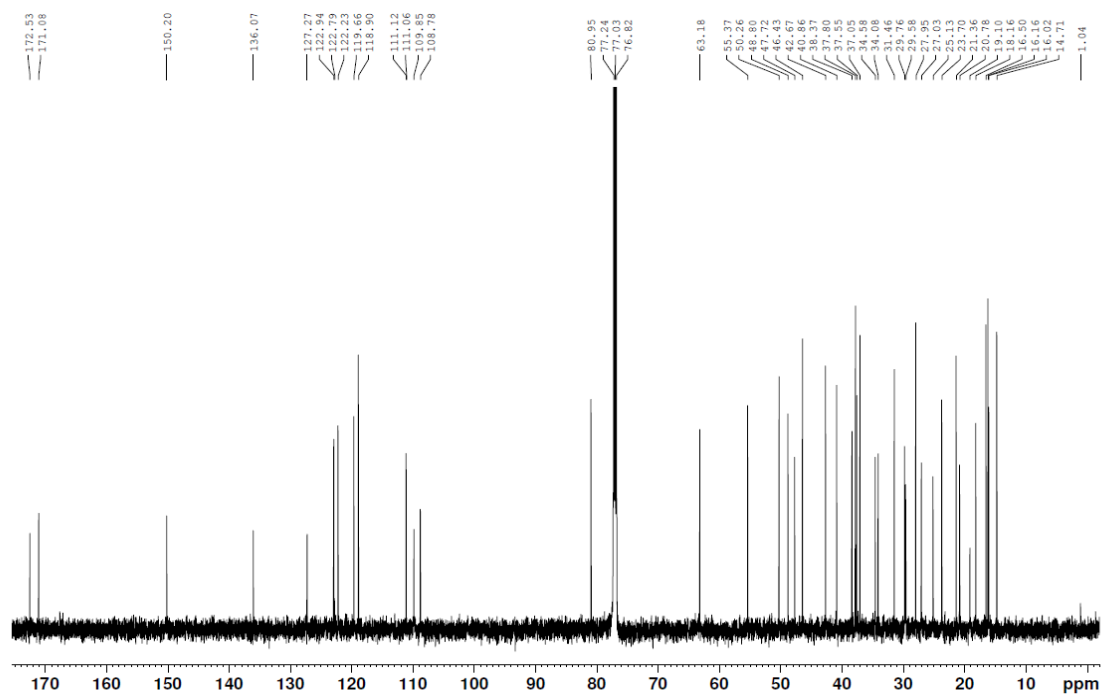

Fig. S6. HRMS spectrum for EB365

Analysis Name D:\Data\EB 365

Method APCI\_low\_mass\_negative.m

Sample Name 1-tolil

Comment

Operator KM

Instrument impact II

1825265.10082

#### Acquisition Parameter

|             |          |                      |          |                  |           |
|-------------|----------|----------------------|----------|------------------|-----------|
| Source Type | APCI     | Ion Polarity         | Negative | Set Nebulizer    | 2.0 Bar   |
| Focus       | Active   | Set Capillary        | 4000 V   | Set Dry Heater   | 200 °C    |
| Scan Begin  | 100 m/z  | Set End Plate Offset | -500 V   | Set Dry Gas      | 4.0 l/min |
| Scan End    | 1600 m/z | Set Charging Voltage | 2000 V   | Set Divert Valve | Source    |
|             |          | Set Corona           | 15000 nA | Set APCI Heater  | 450 °C    |

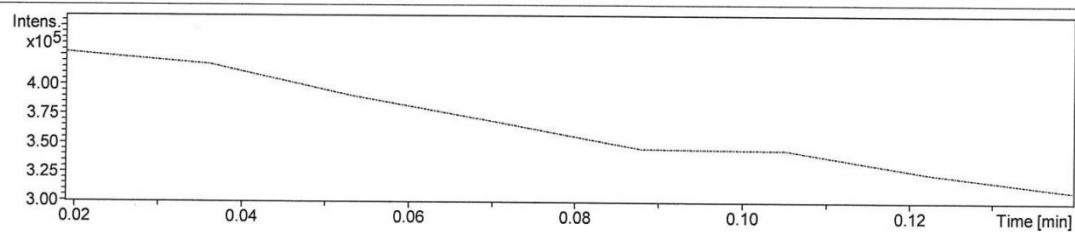

#### -MS, 0.0-0.1min #2-4

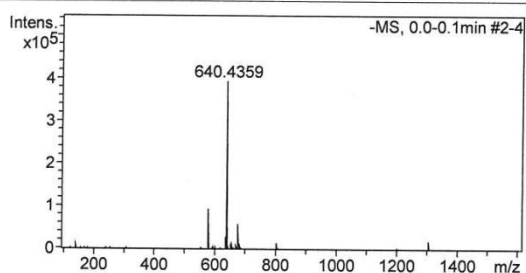

| # | m/z      | Res.  | S/N     | I      | I %   | FWHM   |
|---|----------|-------|---------|--------|-------|--------|
| 1 | 640.4359 | 13145 | 11385.9 | 392594 | 100.0 | 0.0487 |

**Table S1.** Prediction of the ADMET profile of betulin based on computer calculations.

| Parameter                                           | Betulin   |             |
|-----------------------------------------------------|-----------|-------------|
|                                                     | Value     | Probability |
| <b>Absorption</b>                                   |           |             |
| Human intestinal absorption (HIA)                   | +         | 0.9884      |
| Caco-2 permeability                                 | -         | 0.5542      |
| Human oral bioavailability                          | -         | 0.5857      |
| <b>Distribution</b>                                 |           |             |
| Subcellular localization                            | Lysosomes | 0.4831      |
| Blood brain barrier (BBB) permeability              | -         | 0.4831      |
| Organic Anion-Transporting                          |           |             |
| Polypeptide (OATP) inhibitors:                      |           |             |
| OATP 2B1                                            | -         | 0.7184      |
| OATP 1B1                                            | +         | 0.9413      |
| OATP 1B3                                            | +         | 0.9480      |
| Multidrug And Toxin Extrusion Transporter 1 (MATE1) | -         | 1.0000      |
| Organic Cation Transport Protein 2 (OCT2) inhibitor | -         | 0.6385      |
| Bile Salt Export Pump (BSEP) inhibitor              | +         | 0.6370      |
| P-glycoprotein inhibitor                            | -         | 0.8836      |
| P-glycoprotein substrate                            | -         | 0.7347      |
| <b>Metabolism</b>                                   |           |             |
| Cytochrome P450:                                    |           |             |
| CYP450 3A4 substrate                                | +         | 0.6751      |
| CYP450 2C9 substrate                                | -         | 0.6284      |
| CYP450 2D6 substrate                                | -         | 0.7222      |
| CYP450 3A4 inhibition                               | -         | 0.8309      |
| CYP450 2C9 inhibition                               | -         | 0.9071      |
| CYP450 2C19 inhibition                              | -         | 0.9026      |
| CYP450 2D6 inhibition                               | -         | 0.9297      |
| CYP450 1A2 inhibition                               | -         | 0.8309      |
| CYP inhibitory promiscuity                          | -         | 0.6441      |
| <b>Toxicity</b>                                     |           |             |
| Carcinogenicity                                     | -         | 0.9143      |
| Eye corrosion                                       | -         | 0.9927      |
| Eye irritation                                      | -         | 0.9265      |
| Ames mutagenesis                                    | -         | 0.6800      |
| Hepatotoxicity                                      | +         | 0.5250      |
| Nephrotoxicity                                      | -         | 0.9145      |
| Acute Oral Toxicity                                 | III       | 0.6406      |

**Table S2.** The theoretical values of lipophilicity for betulin, betulinic acid, EB355A and EB365

| Compound       | Log $P_{o/w}$ |       |
|----------------|---------------|-------|
|                | WLOGP         | MLOGP |
| Betulin        | 7.00          | 6.00  |
| Betulinic acid | 7.09          | 5.82  |
| EB355A         | 9.27          | 6.61  |
| EB365          | 9.84          | 6.85  |
